# Supplementary figures and images for: Lactobacillus rhamnosus Probio-M9 alleviates OVA-sensitized food allergy through modulating gut microbiota and its metabolism
Source: Royal Society of Chemistry journal article supplement (doi:10.1039/d3fo03321j), 2023-01-01

### Supporting information

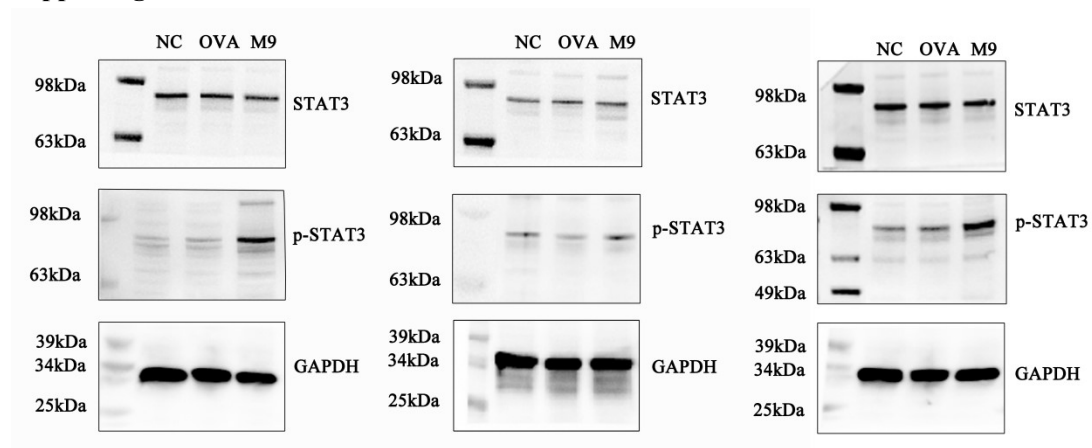

STAT3 and p-STAT3 protein expression (n=3).

Supplement: d3fo03321j1.pdf [file d3fo03321j1.pdf]
